# Supplementary material for: Sonochemical synthesis of HSiW/graphene catalysts for enhanced biomass hydrolysis
Source: Royal Society of Chemistry journal article supplement (doi:10.1039/c4gc02519a), 2015-01-01
Supplement: c4gc02519a1.pdf [file c4gc02519a1.pdf]

**Electronic supplementary material:**

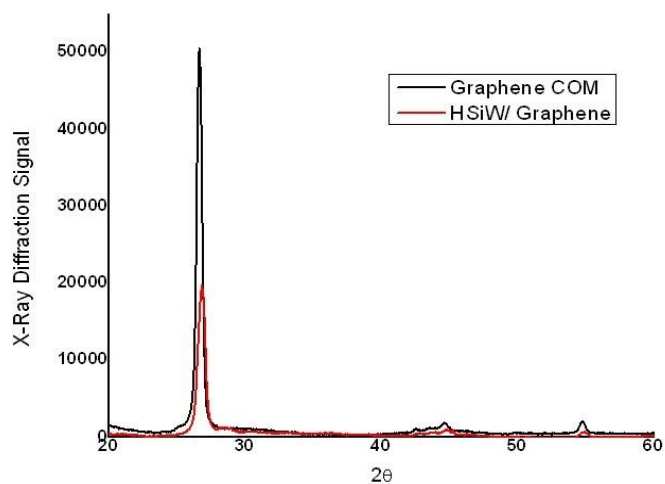

**Fig. S1.** XRD diffraction of graphene commercial (black) and HSiW/G catalyst (red).

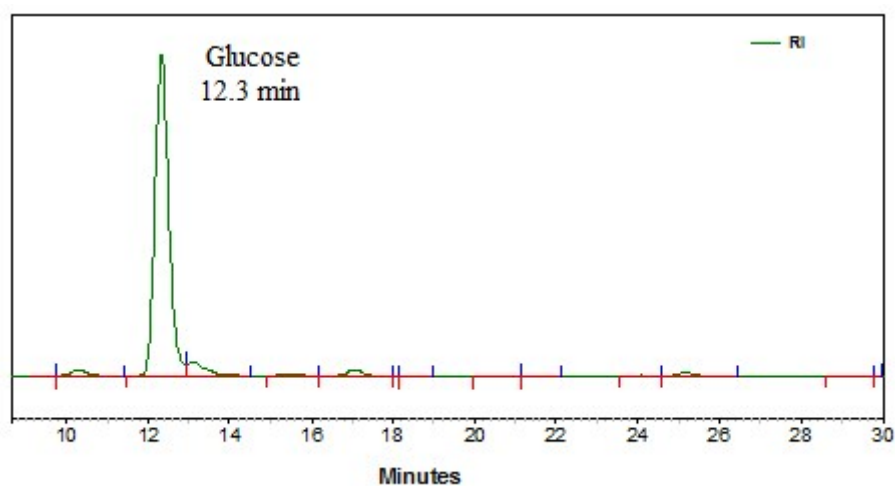

**Fig. S2.** Typical HPLC chromatogram of the hydrolyzate (hydrothermal heating of 1 g glycogen and 1 g HSiW/G in 20 mL water, 150 °C, 4 h).
